# Supplementary material for: Robustness of partial denitrification-anammox (PdNA) in filters with methanol and glycerol as carbon sources
Source: Royal Society of Chemistry journal article supplement (doi:10.1039/d2ew00360k), 2023-01-01
Supplement: d2ew00360k1.pdf [file d2ew00360k1.pdf]

**Partial denitrification-anammox (PdNA) in deep-bed polishing filters: performance evaluation using methanol and glycerol and robustness through seasonal changes and backwashing shear**

Table S1. Bump and backwash settings as well as runtime of methanol and glycerol filters at 4.9 m/hr.

|                                     | Units | Methanol  | Glycerol  |
|-------------------------------------|-------|-----------|-----------|
| <b>Bump settings</b>                |       |           |           |
| valve opening to initiate bump      | %     | 95        | 95        |
| bumping time                        | min   | 3         | 3         |
| bumping flow rate                   | m/hr  | 14.6      | 14.6      |
| <b>Backwash settings</b>            |       |           |           |
| bump frequency to initiate backwash | hours | <4        | <4        |
| air scour time                      | min   | 3         | 3         |
| air scour flow                      | m/min | 1.5       | 1.5       |
| concurrent time                     | min   | 9         | 14        |
| concurrent air flow                 | m/min | 1.5       | 1.5       |
| concurrent water flow               | m/hr  | 14.6      | 14.6      |
| final rinse time                    | min   | 10        | 10        |
| final rinse flow                    | m/hr  | 14.6      | 14.6      |
| <b>Runtime</b>                      | days  | 4.7 ± 1.9 | 4.9 ± 2.1 |

Table S2. Influent characteristics at different loading rates with and without phosphorus addition. The steady state phase discussed in the main paper is the 4.9 m/hr with phosphorus addition

|                                          |                                   | 4.9 m/hr<br>without OP | 7.3 m/hr<br>without OP | 4.9 m/hr<br>with OP | 7.3 m/hr<br>with OP |
|------------------------------------------|-----------------------------------|------------------------|------------------------|---------------------|---------------------|
| Duration                                 | days                              | 60                     | 19                     | 102                 | 56                  |
| <b>Influent concentrations</b>           |                                   |                        |                        |                     |                     |
| NH <sub>4</sub> <sup>+</sup> -N methanol | mg N/L                            | 4.7 ± 2.2              | 4.2 ± 2.6              | 5.1 ± 2.2           | 4.2 ± 1.5           |
| NH <sub>4</sub> <sup>+</sup> -N glycerol | mg N/L                            | 5.4 ± 2.3              | 5.0 ± 2.6              | 5.3 ± 2.1           | 4.6 ± 1.5           |
| NO <sub>2</sub> <sup>-</sup> -N          | mg N/L                            | 1.57 ± 0.5             | 1.57 ± 0.5             | 0.77 ± 0.7          | 0.67 ± 0.2          |
| NO <sub>3</sub> <sup>-</sup> -N          | mg N/L                            | 5.4 ± 2.3              | 4.4 ± 2.7              | 7.0 ± 3.1           | 6.8 ± 1.8           |
| TIN methanol                             | mg N/L                            | 11.6 ± 4.0             | 10.1 ± 5.3             | 12.8 ± 4.9          | 11.6 ± 2.8          |
| TIN glycerol                             | mg N/L                            | 12.2 ± 4.1             | 11.0 ± 5.3             | 13.0 ± 4.8          | 12.0 ± 2.7          |
| OP                                       | mg P/L                            | 0.16 ± 0.16            | 0.11 ± 0.04            | 0.70 ± 0.58         | 0.74 ± 0.42         |
| TSS                                      | mg TSS/L                          | 7.0 ± 2.8              | 9.5 ± 3.3              | 7.7 ± 2.7           | 10.3 ± 3.3          |
| AvN methanol                             |                                   | 0.74 ± 0.35            | 0.71 ± 0.21            | 0.70 ± 0.32         | 0.58 ± 0.22         |
| AvN glycerol                             |                                   | 0.84 ± 0.35            | 0.87 ± 0.23            | 0.72 ± 0.34         | 0.64 ± 0.22         |
| <b>Loading rates</b>                     |                                   |                        |                        |                     |                     |
| Hydraulic                                | m <sup>3</sup> /m <sup>2</sup> /h | 4.9                    | 7.3                    | 4.9                 | 7.3                 |
| NH <sub>4</sub> <sup>+</sup> -N methanol | g N/m <sup>3</sup> /d             | 307 ± 142              | 408 ± 246              | 326 ± 139           | 396 ± 154           |
| NH <sub>4</sub> <sup>+</sup> -N glycerol | g N/m <sup>3</sup> /d             | 351 ± 151              | 485 ± 245              | 337 ± 136           | 432 ± 152           |
| NO <sub>3</sub> <sup>-</sup> -N          | g N/m <sup>3</sup> /d             | 348 ± 156              | 427 ± 255              | 450 ± 201           | 636 ± 181           |
| TIN methanol                             | g N/m <sup>3</sup> /d             | 749 ± 267              | 979 ± 508              | 819 ± 313           | 1090 ± 286          |
| TIN glycerol                             | g N/m <sup>3</sup> /d             | 793 ± 280              | 1056 ± 508             | 830 ± 310           | 1125 ± 283          |
| TSS                                      | g TSS/ m <sup>3</sup> /d          | 456 ± 177              | 915 ± 320              | 493 ± 170           | 845 ± 453           |

Table S3. Backwash procedure applied to the filters during the backwash test. The flow settings were the same as Table S1. \*Initial concurrent times in the methanol and glycerol filters were respectively 9 and 14 minutes.

| Procedure                                 | Unit | Air scour | Concurrent | Final rinse |
|-------------------------------------------|------|-----------|------------|-------------|
| Baseline                                  | min  | 3         | 9/14*      | 10          |
| three series of three backwashes in a row | min  | 3         | 14         | 10          |
| increased air scour time                  | min  | 240       | 14         | 10          |
| increased air scour and final rinse times | min  | 240       | 40         | 30          |

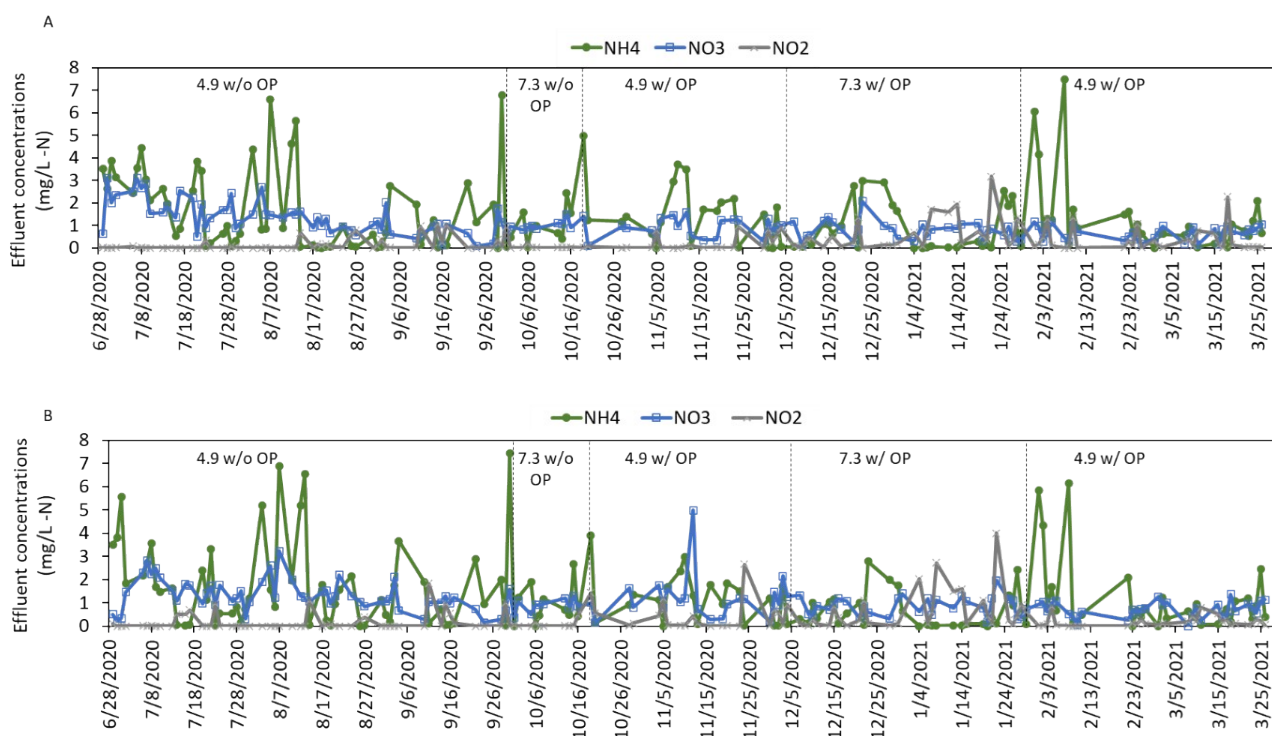

Figure S1. Effluent ammonium, nitrite and nitrate concentrations at 4.9 and 7.3 m/hr with and without phosphorus addition. A. Methanol filter, B. Glycerol filter. The steady state phase discussed in the main paper is at 4.9 m/hr with phosphorus addition.

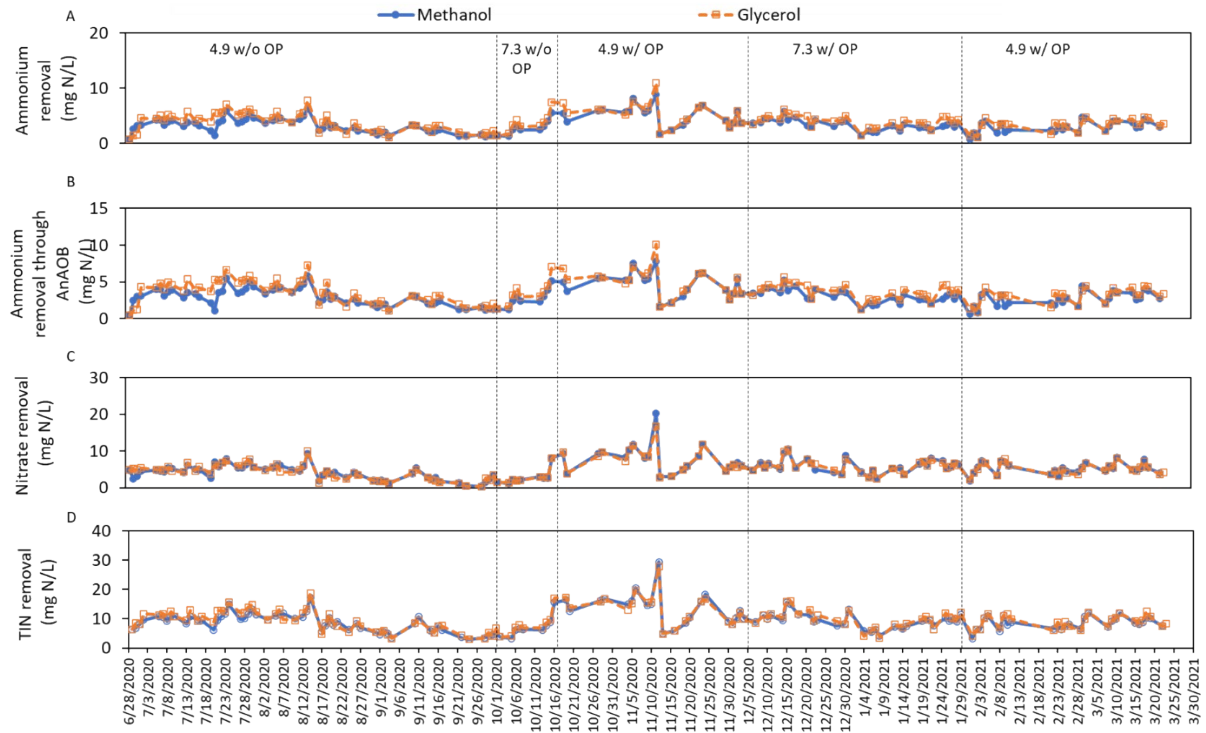

Figure S2. Methanol and glycerol filters removal at 4.9 and 7.3 m/hr with and without phosphorus addition. A. Ammonium removal, B. Ammonium removal through AnAOB, C. nitrate removal, D. TIN removal. The steady state phase discussed in the main paper is at 4.9 m/hr with phosphorus addition

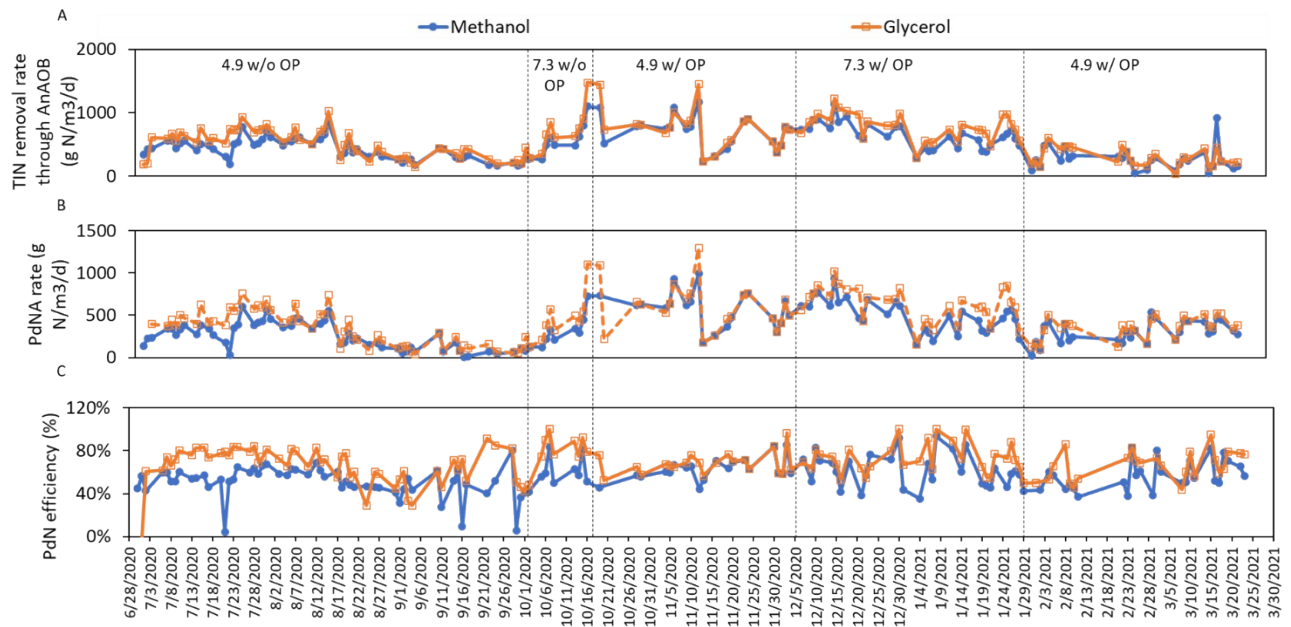

Figure S3. Methanol and glycerol filters performance at 4.9 and 7.3 m/hr with and without phosphorus addition. A. TIN removal rate through AnAOB, B. PdNA rate, C. PdN efficiency. The steady state phase discussed in the main paper is at 4.9 m/hr with phosphorus addition.

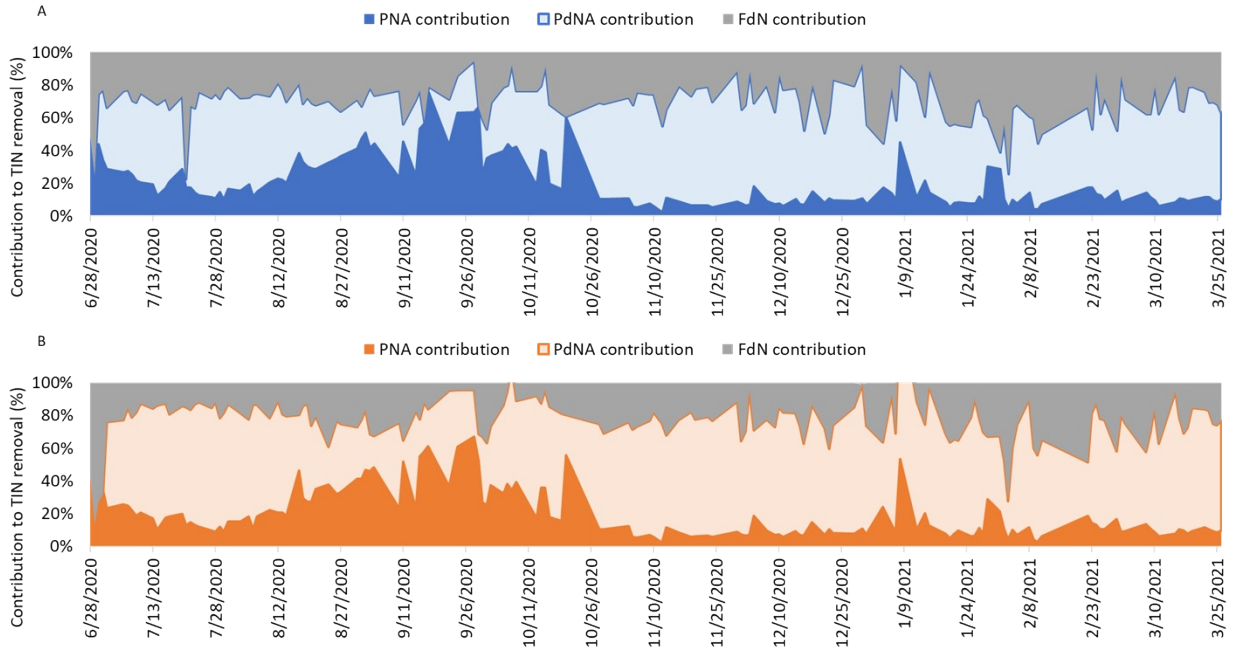

Figure S4. Contribution to TIN removal via incoming nitrite, PdNA and FdN routes for the methanol (A) and glycerol (B) filters.
